# Supplementary material for: Mechanochemically-assisted synthesis of 3D, 2D and quasi 2D lead halide perovskites for supercapacitor applications
Source: Royal Society of Chemistry journal article supplement (doi:10.1039/d3ma01144e), 2024-01-01
Supplement: d3ma01144e1.pdf [file d3ma01144e1.pdf]

## Supplementary Information

### Mechanochemically-Assisted Synthesis of 3D, 2D and quasi 2D Lead Halide Perovskites for Supercapacitor Application

Apurba Mahapatra,<sup>a\*</sup> Manoranjan Mandal,<sup>b</sup> Ayon Das Mahapatra,<sup>c</sup> Vishnu Anilkumar,<sup>a</sup> Jan Nawrocki,<sup>a</sup> Rohit D. Chavan,<sup>a</sup> Pankaj Yadav<sup>d,\*</sup> and Daniel Prochowicz<sup>a,\*</sup>

<sup>a</sup> Institute of Physical Chemistry, Polish Academy of Sciences, Kasprzaka 44/52, 01-224 Warsaw, Poland.

<sup>b</sup> Department of Physics, School of Science, GITAM University, Bengaluru, 561203, India.

<sup>c</sup> Institute of Chemistry, Hebrew University of Jerusalem, Jerusalem- 9190401, Israel.

<sup>d</sup> Department of Solar Energy, School of Energy Technology, Pandit Deendayal Energy University, Gandhinagar-382 007, Gujarat, India.

**Corresponding authors:** amahapatra@ichf.edu.pl; pankaj.yadav@sse.pdpu.ac.in; dprochowicz@ichf.edu.pl

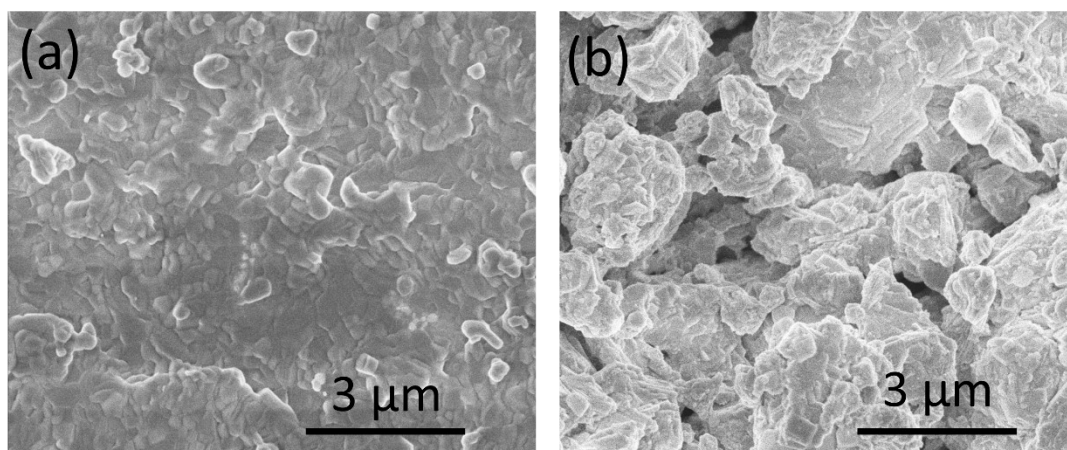

**Figure S1.** SEM images of the synthesized (a)  $\text{BA}_2\text{PbBr}_4$  (2D) and (b)  $\text{BA}_2\text{MAPb}_2\text{Br}_7$  (2D/3D) MSP.

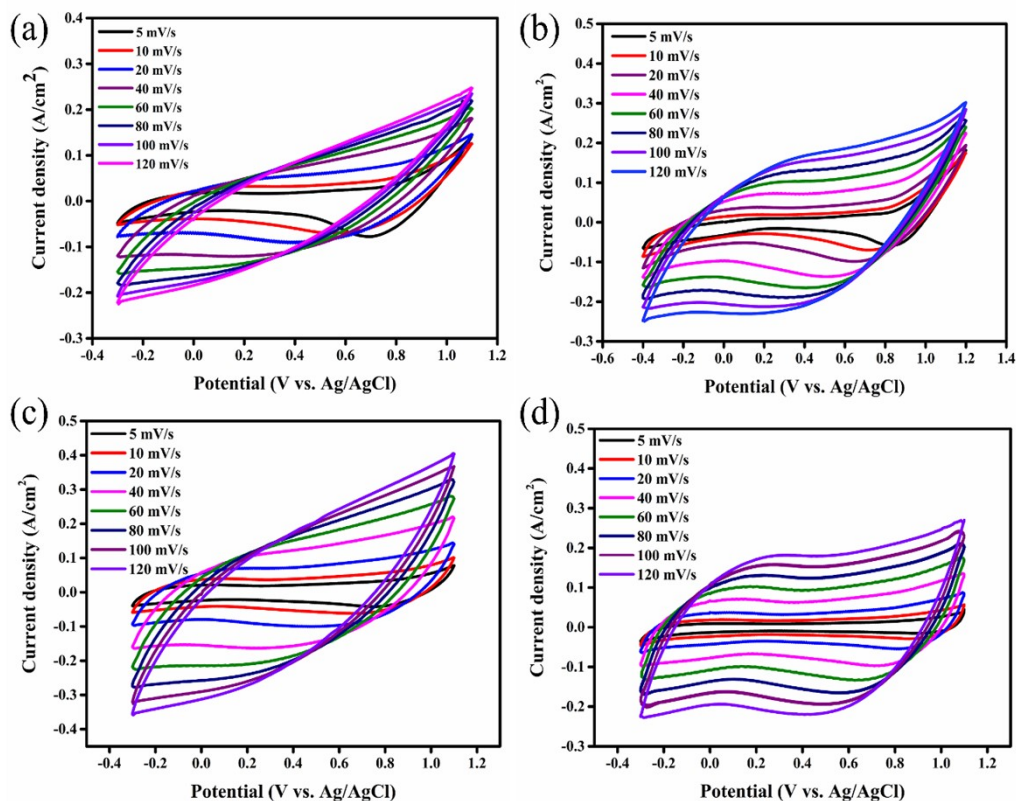

**Figure S2.** Cyclic-voltammetry (CV) curves of (a) MAPbBr<sub>3</sub> SCP, (b) MAPbBr<sub>3</sub> MSP, (c) BA<sub>2</sub>PbBr<sub>4</sub> (2D) MSP, and (d) BA<sub>2</sub>MAPb<sub>2</sub>Br<sub>7</sub> (quasi-2D) MSP electrode recorded at different scan rates.

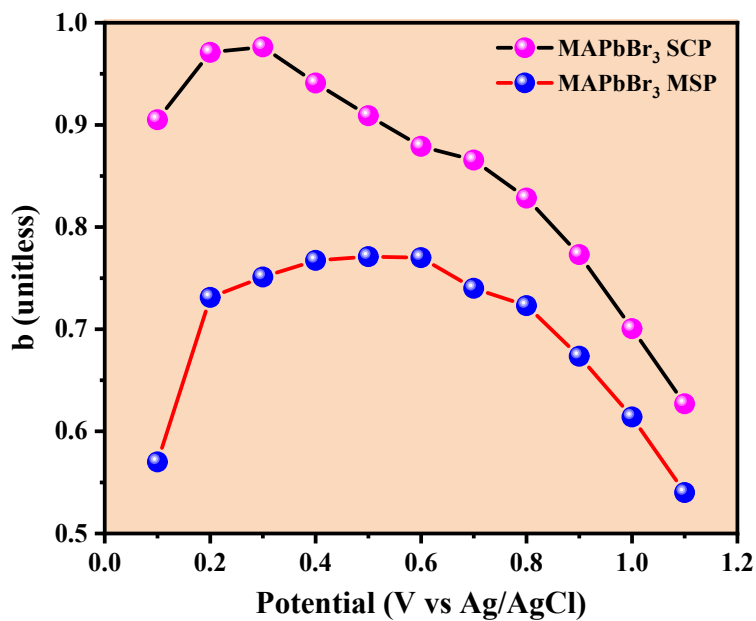

**Figure S3.** Applied potential dependent change in Dunn law coefficient  $b$  of MAPbBr<sub>3</sub> SCP and MSP electrodes.

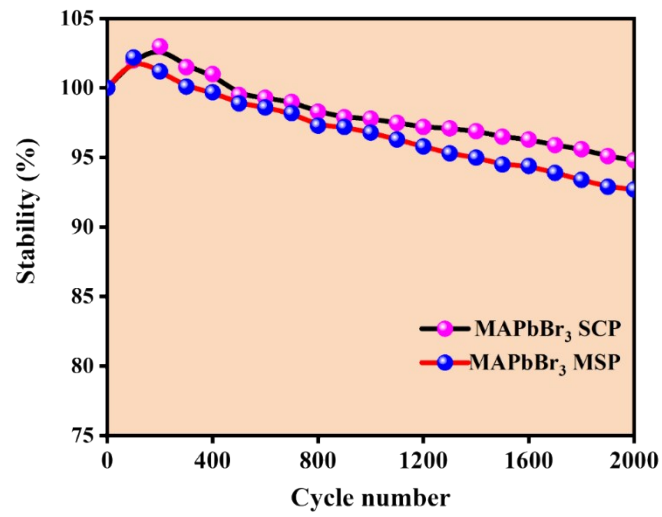

**Figure S4.** Cyclic stability of MAPbBr<sub>3</sub> SCP and MSP electrode.

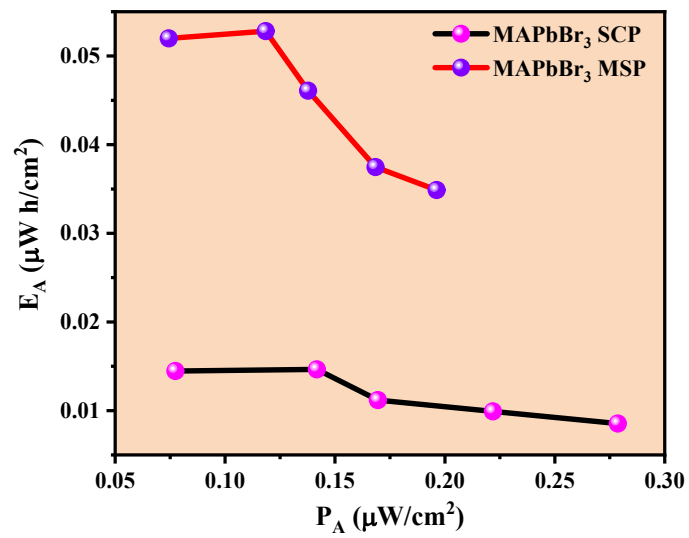

**Figure S5.** Ragone plot of MAPbBr<sub>3</sub> SCP and MSP electrodes.

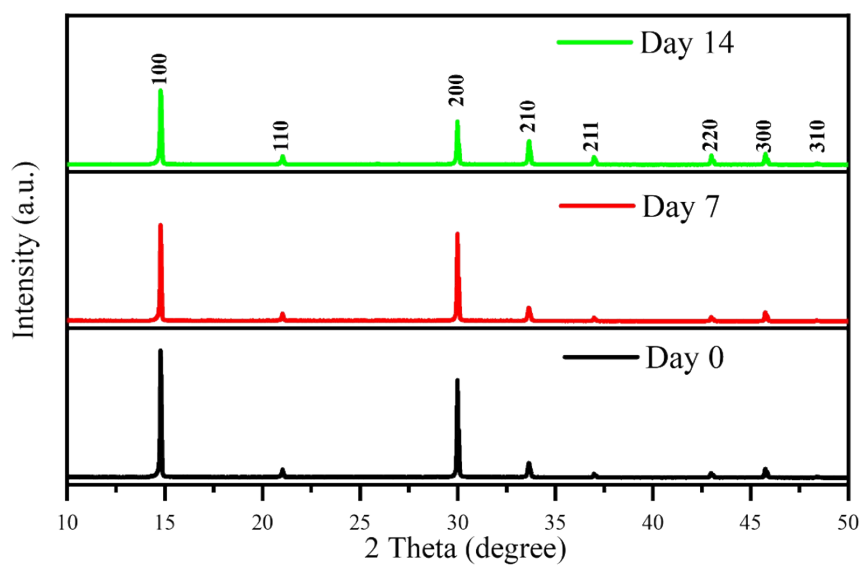

**Figure S6.** XRD patterns of the of fresh and aged MAPbBr<sub>3</sub> MSP based electrode stored at ambient conditions.

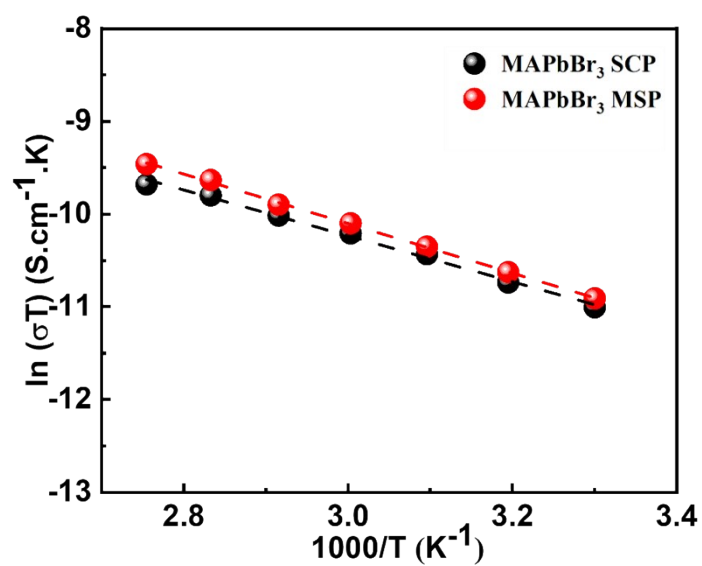

**Figure S7.** The temperature-dependent conductivity of MAPbBr<sub>3</sub> SCP and MSP pellets.

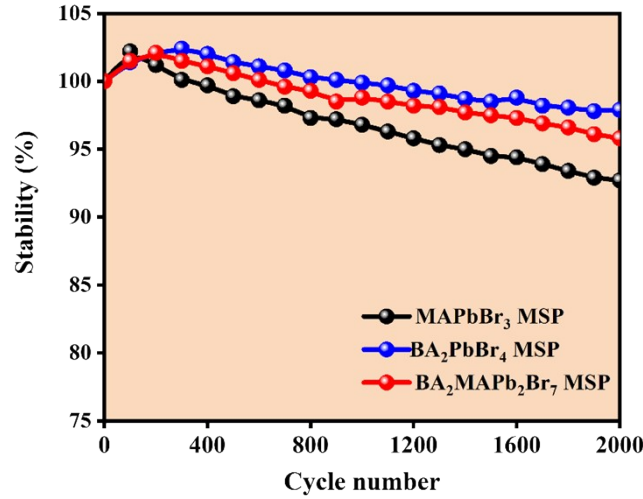

**Figure S8.** Cyclic stability of MAPbBr<sub>3</sub>, BA<sub>2</sub>PbBr<sub>4</sub>, and BA<sub>2</sub>MAPb<sub>2</sub>Br<sub>7</sub> MSP-based electrodes.

**Table S1.** Comparison of the electrochemical performances of various LHP based electrodes in terms of capacitance and cycling stability.

| Materials (LHPs)                                              | Capacitance from CV                  | Capacitance from GCD                                | Stability                 | Ref.      |
|---------------------------------------------------------------|--------------------------------------|-----------------------------------------------------|---------------------------|-----------|
| MAPbBr <sub>3</sub> single crystal                            | 81.5 mF cm <sup>-2</sup><br>@5 mV/s  | 61.2 mF. cm <sup>-2</sup><br>@0.3A/g                | 97% after 1500 cycles     | 1         |
| MAPbBr <sub>3</sub> thin film                                 | 39.8 μF cm <sup>-2</sup><br>@5 mV/s  | -                                                   | Degraded after few cycles |           |
| MAPbBr <sub>3</sub> single crystal                            | 58.5 mF cm <sup>-2</sup><br>@5 mV/s  | 60 mF. cm <sup>-2</sup><br>@0.6 mA cm <sup>-2</sup> | 98% after 1000 cycles     | 2         |
| MAPbI <sub>3</sub> thin film                                  | 21.5 μF cm <sup>-2</sup><br>@10 mV/s | -                                                   | 92.3% after 3000 cycles   | 3         |
| MAPbBr <sub>3</sub> SCP                                       | 75 mF cm <sup>-2</sup><br>@5 mV/s    | 50.22 F g <sup>-1</sup><br>@0.2 mA cm <sup>-2</sup> | 95% after 2000 cycles     | This Work |
| MAPbBr <sub>3</sub> MSP                                       | 159 mF cm <sup>-2</sup><br>@5 mV/s   | 98.38 F g <sup>-1</sup><br>@0.2 mA cm <sup>-2</sup> | 93% after 2000 cycles     |           |
| PEA <sub>2</sub> PbBr <sub>4</sub> thin film                  | 24.5 mF cm <sup>-2</sup><br>@5 mV/s  | 25 mF. cm <sup>-2</sup><br>@0.6 mA cm <sup>-2</sup> | 100% after 1000 cycles    | 2         |
| MA <sub>2</sub> PbBr <sub>4</sub> (2D) MSP                    | 209 mF cm <sup>-2</sup><br>@5 mV/s   | mF. cm <sup>-2</sup> @0.2<br>mA cm <sup>-2</sup>    | 98% after 2000 cycles     | This Work |
| BA <sub>2</sub> MAPb <sub>2</sub> Br <sub>7</sub> (2D/3D) MSP | 205 mF cm <sup>-2</sup><br>@5 mV/s   | mF. cm <sup>-2</sup> @0.2<br>mA cm <sup>-2</sup>    | 96% after 2000 cycles     |           |

## References

- 1 R. Kumar, P. S. Shukla, G. D. Varma and M. Bag, *Electrochim. Acta*, 2021, **398**, 139344.
- 2 R. Kumar and M. Bag, *J. Phys. Chem. C*, 2021, **125**, 16946–16954.
- 3 L. E. Oloore, M. A. Gondal, A. J. Popoola and I. K. Popoola, *Electrochim. Acta*, 2020, **361**, 137082.
